# Supplementary material
Source: publisher figshare collection journal article supplement (https://acs.figshare.com/ndownloader/files/3864769)
Supplement: Supplementary file 1 [file 3864769]

## Sheet: Table S4A
Table S4A. List of significant biological processes for atrial enriched proteins.
GO Terms	Number of Proteins	% Coverage	P-Value
intracellular transport	13	9.8	0.0076
cellular component morphogenesis	10	7.5	0.0053
cellular homeostasis	10	7.5	0.014
actin filament-based process	9	6.8	0.00082
regulation of cellular protein metabolic process	9	6.8	0.041
cell morphogenesis	8	6	0.027
cell redox homeostasis	7	5.3	1.2e-05
extracellular matrix organization	7	5.3	0.00021
extracellular structure organization	7	5.3	0.0022
protein folding	7	5.3	0.0034
actin cytoskeleton organization	7	5.3	0.011
lipid biosynthetic process	7	5.3	0.05
positive regulation of protein modification process	6	4.5	0.019
glycoprotein metabolic process	6	4.5	0.025
positive regulation of cellular protein metabolic process	6	4.5	0.043
ubiquitin-dependent protein catabolic process	6	4.5	0.049
positive regulation of protein metabolic process	6	4.5	0.05
cytoskeleton-dependent intracellular transport	5	3.8	0.00086
regulation of cell morphogenesis	5	3.8	0.023
cellular amino acid derivative metabolic process	5	3.8	0.048
actin filament-based movement	4	3	0.00084
peptide cross-linking	4	3	0.0012
collagen fibril organization	4	3	0.0017
regulation of cell shape	4	3	0.0098
positive regulation of ubiquitin-protein ligase activity during mitotic cell cycle	4	3	0.018
positive regulation of ubiquitin-protein ligase activity	4	3	0.02
regulation of ubiquitin-protein ligase activity during mitotic cell cycle	4	3	0.021
positive regulation of ligase activity	4	3	0.022
heart morphogenesis	4	3	0.022
regulation of ubiquitin-protein ligase activity	4	3	0.026
regulation of ligase activity	4	3	0.029
positive regulation of protein ubiquitination	4	3	0.032
regulation of protein ubiquitination	4	3	0.049
adult heart development	3	2.3	0.0035
oxygen transport	3	2.3	0.0049
gas transport	3	2.3	0.0094
myofibril assembly	3	2.3	0.013
actomyosin structure organization	3	2.3	0.022
cellular component assembly involved in morphogenesis	3	2.3	0.035
proteoglycan metabolic process	3	2.3	0.048
peptidyl-proline hydroxylation to 4-hydroxy-L-proline	2	1.5	0.024
4-hydroxyproline metabolic process	2	1.5	0.024
nuclear migration	2	1.5	0.032
peptidyl-proline modification	2	1.5	0.032
atrial cardiac muscle morphogenesis	2	1.5	0.032
ventricular cardiac muscle cell development	2	1.5	0.048
peptide cross-linking via chondroitin 4-sulfate glycosaminoglycan	2	1.5	0.048

## Sheet: Table S4B
Table S4B. List of significant biological processes for ventricular enriched proteins.
GO Terms	Number of Proteins	% Coverage	P-Value
cell adhesion	10	13.2	0.0028
biological adhesion	10	13.2	0.0028
oxidation reduction	9	11.8	0.0056
muscle contraction	8	10.5	3.8e-06
muscle system process	8	10.5	7.1e-06
regulation of system process	8	10.5	0.00034
heart development	7	9.2	0.00031
tissue morphogenesis	6	7.9	0.001
muscle organ development	6	7.9	0.0021
actin filament-based process	6	7.9	0.0037
cardiac muscle tissue development	5	6.6	0.0001
cellular carbohydrate catabolic process	5	6.6	0.00048
carbohydrate catabolic process	5	6.6	0.0012
striated muscle tissue development	5	6.6	0.0017
muscle tissue development	5	6.6	0.002
actin cytoskeleton organization	5	6.6	0.016
generation of precursor metabolites and energy	5	6.6	0.045
ventricular cardiac muscle morphogenesis	4	5.3	0.00011
cardiac muscle tissue morphogenesis	4	5.3	0.0002
muscle tissue morphogenesis	4	5.3	0.0002
heart morphogenesis	4	5.3	0.0038
regulation of heart contraction	4	5.3	0.0044
muscle cell differentiation	4	5.3	0.015
glucose metabolic process	4	5.3	0.028
purine nucleotide metabolic process	4	5.3	0.045
hexose metabolic process	4	5.3	0.049
myofibril assembly	3	3.9	0.0036
actomyosin structure organization	3	3.9	0.0064
cellular component assembly involved in morphogenesis	3	3.9	0.01
cell junction assembly	3	3.9	0.013
striated muscle contraction	3	3.9	0.017
monocarboxylic acid transport	3	3.9	0.019
striated muscle cell development	3	3.9	0.021
muscle cell development	3	3.9	0.024
cell junction organization	3	3.9	0.025
regulation of muscle contraction	3	3.9	0.038
alcohol catabolic process	3	3.9	0.047
fructose 1,6-bisphosphate metabolic process	2	2.6	0.021
glycogen catabolic process	2	2.6	0.025
cellular polysaccharide catabolic process	2	2.6	0.03
fructose 6-phosphate metabolic process	2	2.6	0.03
glucan catabolic process	2	2.6	0.03
actin-myosin filament sliding	2	2.6	0.038
muscle filament sliding	2	2.6	0.038
cGMP-mediated signaling	2	2.6	0.038
actin-mediated cell contraction	2	2.6	0.038
positive regulation of ATPase activity	2	2.6	0.038
cardiac muscle cell development	2	2.6	0.046
cardiac cell development	2	2.6	0.046
sarcomere organization	2	2.6	0.05

## Sheet: Table S4C
Table S4C. List of significant biological processes for commonly expressed proteins.
GO Terms	Number of Proteins	% Coverage	P-Value
protein localization	275	10.2	5.6e-28
establishment of protein localization	250	9.3	2.2e-28
protein transport	248	9.2	3.1e-28
intracellular transport	243	9.1	1.8e-37
macromolecular complex subunit organization	216	8.1	1.6e-20
oxidation reduction	208	7.8	1.1e-23
macromolecular complex assembly	202	7.5	3.8e-19
phosphorus metabolic process	200	7.5	0.00092
phosphate metabolic process	200	7.5	0.00092
translation	194	7.2	1.7e-67
RNA processing	194	7.2	3.5e-27
response to organic substance	174	6.5	1.8e-07
macromolecule catabolic process	173	6.4	4.7e-05
vesicle-mediated transport	172	6.4	2.2e-15
cell cycle	170	6.3	0.0001
phosphorylation	170	6.3	0.00049
cellular macromolecule catabolic process	162	6	5.3e-05
regulation of cell death	160	6	0.017
regulation of programmed cell death	159	5.9	0.019
regulation of apoptosis	158	5.9	0.017
generation of precursor metabolites and energy	155	5.8	2.7e-41
mRNA metabolic process	155	5.8	9.9e-31
negative regulation of macromolecule metabolic process	150	5.6	0.0053
protein complex biogenesis	148	5.5	1.2e-12
protein complex assembly	148	5.5	1.2e-12
cytoskeleton organization	147	5.5	1.9e-18
cellular macromolecule localization	145	5.4	7.1e-20
death	145	5.4	0.012
cellular protein localization	144	5.4	9.3e-20
cell death	144	5.4	0.013
mRNA processing	141	5.3	1.5e-30
intracellular protein transport	137	5.1	9e-21
cellular macromolecular complex subunit organization	136	5.1	2.1e-22
protein catabolic process	136	5.1	0.00058
RNA splicing	135	5	1.4e-33
regulation of cellular protein metabolic process	133	5	4.7e-10
positive regulation of molecular function	133	5	0.00013
cell cycle process	132	4.9	3.5e-05
proteolysis involved in cellular protein catabolic process	131	4.9	0.00079
cellular protein catabolic process	131	4.9	0.00097
membrane organization	128	4.8	8.2e-16
modification-dependent protein catabolic process	123	4.6	0.0023
modification-dependent macromolecule catabolic process	123	4.6	0.0023
programmed cell death	123	4.6	0.018
cellular macromolecular complex assembly	122	4.5	1.8e-20
apoptosis	120	4.5	0.025
positive regulation of catalytic activity	116	4.3	0.00071
cellular response to stress	112	4.2	0.036
mitotic cell cycle	101	3.8	3e-07
cellular homeostasis	94	3.5	0.035
nitrogen compound biosynthetic process	90	3.4	7.3e-07
RNA splicing, via transesterification reactions	88	3.3	1e-29
nuclear mRNA splicing, via spliceosome	88	3.3	1e-29
RNA splicing, via transesterification reactions with bulged adenosine as nucleophile	88	3.3	1e-29
cellular component morphogenesis	87	3.2	0.0057
actin filament-based process	86	3.2	1.7e-12
protein folding	84	3.1	4.7e-21
cofactor metabolic process	84	3.1	7.7e-18
actin cytoskeleton organization	84	3.1	2.5e-13
translational elongation	83	3.1	3.6e-46
ubiquitin-dependent protein catabolic process	83	3.1	4.4e-11
response to endogenous stimulus	83	3.1	0.033
energy derivation by oxidation of organic compounds	81	3	1.7e-26
protein targeting	81	3	3e-13
negative regulation of molecular function	81	3	0.0004
regulation of protein modification process	77	2.9	4.7e-05
negative regulation of cell death	76	2.8	0.023
response to hormone stimulus	76	2.8	0.034
negative regulation of protein metabolic process	75	2.8	6.2e-14
small GTPase mediated signal transduction	75	2.8	0.00043
negative regulation of programmed cell death	75	2.8	0.03
posttranscriptional regulation of gene expression	74	2.8	1.8e-10
monosaccharide metabolic process	74	2.8	2.3e-09
negative regulation of apoptosis	74	2.8	0.03
negative regulation of cellular protein metabolic process	73	2.7	7.1e-14
negative regulation of catalytic activity	73	2.7	5.4e-05
cellular protein complex assembly	71	2.6	1.4e-15
response to inorganic substance	71	2.6	7.9e-10
muscle organ development	69	2.6	2e-08
microtubule-based process	68	2.5	5.2e-05
electron transport chain	67	2.5	1.8e-23
hexose metabolic process	67	2.5	1.8e-09
regulation of organelle organization	67	2.5	3.7e-07
cellular respiration	66	2.5	2.3e-28
ncRNA metabolic process	65	2.4	1.5e-05
positive regulation of protein metabolic process	65	2.4	9.1e-05
coenzyme metabolic process	64	2.4	5.6e-13
nucleobase, nucleoside and nucleotide biosynthetic process	62	2.3	2.3e-07
nucleobase, nucleoside, nucleotide and nucleic acid biosynthetic process	62	2.3	2.3e-07
glucose metabolic process	61	2.3	2.3e-11
nucleotide biosynthetic process	61	2.3	1.3e-07
positive regulation of cellular protein metabolic process	61	2.3	0.00029
Golgi vesicle transport	60	2.2	2.7e-14
endocytosis	60	2.2	9.8e-05
membrane invagination	60	2.2	9.8e-05
ribonucleoprotein complex biogenesis	58	2.2	5.3e-07
purine nucleotide metabolic process	58	2.2	1.7e-06
regulation of cellular component size	58	2.2	0.036
mitochondrion organization	57	2.1	2.2e-11
protein localization in organelle	57	2.1	2.9e-10
oxidative phosphorylation	56	2.1	6.3e-19
nucleocytoplasmic transport	56	2.1	1.4e-08
nuclear transport	56	2.1	2.4e-08
muscle system process	56	2.1	2.5e-07
regulation of cytoskeleton organization	54	2	4.4e-10
response to oxidative stress	54	2	6.5e-07
negative regulation of protein modification process	52	1.9	1.5e-11
ribonucleotide metabolic process	52	1.9	8.6e-08
positive regulation of protein modification process	52	1.9	0.00018
muscle contraction	51	1.9	9.2e-07
fatty acid metabolic process	51	1.9	0.0014
heart development	51	1.9	0.0081
proteasomal protein catabolic process	50	1.9	2e-13
proteasomal ubiquitin-dependent protein catabolic process	50	1.9	2e-13
protein oligomerization	50	1.9	0.0001
organelle fission	50	1.9	0.038
nucleobase, nucleoside, nucleotide and nucleic acid transport	48	1.8	3.2e-10
regulation of translation	48	1.8	4e-07
purine ribonucleotide metabolic process	48	1.8	5.1e-07
regulation of cellular component biogenesis	48	1.8	1.3e-06
anti-apoptosis	48	1.8	0.014
response to drug	48	1.8	0.032
protein import	47	1.8	2.5e-07
purine nucleotide biosynthetic process	47	1.8	1.1e-05
RNA localization	46	1.7	3.2e-11
muscle cell differentiation	46	1.7	4.7e-08
negative regulation of cellular component organization	45	1.7	1.9e-05
establishment of RNA localization	44	1.6	1.6e-10
RNA transport	44	1.6	1.6e-10
nucleic acid transport	44	1.6	1.6e-10
regulation of protein ubiquitination	44	1.6	5.2e-10
positive regulation of cellular component organization	44	1.6	0.0092
respiratory electron transport chain	43	1.6	2.7e-18
carbohydrate catabolic process	43	1.6	4.1e-08
DNA replication	43	1.6	0.032
positive regulation of protein ubiquitination	42	1.6	9.6e-12
ribonucleotide biosynthetic process	42	1.6	6.2e-06
nucleoside triphosphate metabolic process	41	1.5	6.4e-05
microtubule cytoskeleton organization	41	1.5	0.0009
extracellular structure organization	41	1.5	0.0067
mRNA transport	40	1.5	7.5e-10
muscle tissue development	40	1.5	4.6e-05
response to metal ion	40	1.5	9.9e-05
regulation of ubiquitin-protein ligase activity	39	1.5	5.9e-11
regulation of ligase activity	39	1.5	2.4e-10
carboxylic acid catabolic process	39	1.5	5.3e-06
organic acid catabolic process	39	1.5	5.3e-06
purine ribonucleotide biosynthetic process	39	1.5	2.1e-05
tRNA metabolic process	39	1.5	2.6e-05
striated muscle tissue development	39	1.5	3.2e-05
purine nucleoside triphosphate metabolic process	39	1.5	6e-05
positive regulation of ubiquitin-protein ligase activity	38	1.4	4.6e-12
positive regulation of ligase activity	38	1.4	2.4e-11
regulation of protein complex assembly	38	1.4	3.5e-08
ATP synthesis coupled electron transport	37	1.4	2.1e-15
mitochondrial ATP synthesis coupled electron transport	37	1.4	2.1e-15
regulation of ubiquitin-protein ligase activity during mitotic cell cycle	37	1.4	4.3e-11
cellular carbohydrate catabolic process	37	1.4	2.1e-08
cofactor biosynthetic process	37	1.4	1.1e-06
response to protein stimulus	37	1.4	1.4e-05
purine ribonucleoside triphosphate metabolic process	37	1.4	0.00012
ribonucleoside triphosphate metabolic process	37	1.4	0.00015
response to nutrient	37	1.4	0.0044
anaphase-promoting complex-dependent proteasomal ubiquitin-dependent protein catabolic process	36	1.3	8.6e-12
positive regulation of ubiquitin-protein ligase activity during mitotic cell cycle	36	1.3	4.7e-11
negative regulation of protein ubiquitination	36	1.3	9.3e-10
alcohol catabolic process	36	1.3	1.8e-08
regulation of actin filament-based process	36	1.3	7.7e-07
negative regulation of ubiquitin-protein ligase activity during mitotic cell cycle	35	1.3	4.9e-11
negative regulation of ubiquitin-protein ligase activity	35	1.3	1.5e-10
negative regulation of ligase activity	35	1.3	1.5e-10
ATP metabolic process	35	1.3	6e-05
Ras protein signal transduction	35	1.3	6e-05
ribosome biogenesis	35	1.3	0.0013
monosaccharide catabolic process	34	1.3	4.9e-09
striated muscle cell differentiation	34	1.3	2.3e-06
regulation of actin cytoskeleton organization	34	1.3	3.1e-06
response to unfolded protein	33	1.2	2.1e-08
aging	33	1.2	0.00084
mitochondrial electron transport, NADH to ubiquinone	32	1.2	4.2e-16
glucose catabolic process	32	1.2	1.7e-10
hexose catabolic process	32	1.2	3.8e-08
microtubule-based movement	32	1.2	0.0028
chromatin assembly or disassembly	32	1.2	0.017
amino acid activation	31	1.2	2.7e-13
tRNA aminoacylation for protein translation	31	1.2	2.7e-13
tRNA aminoacylation	31	1.2	2.7e-13
mitochondrial transport	31	1.2	1.6e-07
nuclear import	31	1.2	5.5e-05
organelle localization	31	1.2	0.00014
secondary metabolic process	30	1.1	1.5e-05
protein import into nucleus	30	1.1	9.1e-05
protein localization in nucleus	30	1.1	0.00051
purine nucleoside triphosphate biosynthetic process	30	1.1	0.0013
nucleoside triphosphate biosynthetic process	30	1.1	0.0021
DNA packaging	30	1.1	0.016
oxidoreduction coenzyme metabolic process	29	1.1	1e-09
regulation of protein polymerization	29	1.1	1.5e-06
ribonucleoprotein complex assembly	29	1.1	2.2e-06
protein homooligomerization	29	1.1	0.0014
purine ribonucleoside triphosphate biosynthetic process	29	1.1	0.0023
ribonucleoside triphosphate biosynthetic process	29	1.1	0.0027
extracellular matrix organization	29	1.1	0.0058
regulation of lipid metabolic process	29	1.1	0.016
regulation of actin filament length	28	1	9.1e-07
cell redox homeostasis	28	1	9.1e-07
cellular lipid catabolic process	28	1	5.7e-05
negative regulation of organelle organization	28	1	0.00025
cell-substrate adhesion	28	1	0.0048
aerobic respiration	27	1	8.6e-14
cellular amide metabolic process	27	1	2.1e-07
regulation of actin polymerization or depolymerization	27	1	1.6e-06
actin filament organization	27	1	5.6e-05
ATP biosynthetic process	27	1	0.0023
rRNA processing	27	1	0.0038
rRNA metabolic process	27	1	0.007
muscle cell development	26	1	9.1e-07
nitrogen compound catabolic process	26	1	4.1e-05
response to reactive oxygen species	26	1	0.00033
nucleosome organization	26	1	0.009
glycolysis	25	0.9	6.4e-08
regulation of protein complex disassembly	25	0.9	4.6e-07
post-Golgi vesicle-mediated transport	25	0.9	7.6e-06
establishment of organelle localization	25	0.9	0.00021
cofactor catabolic process	24	0.9	2.5e-12
nicotinamide nucleotide metabolic process	24	0.9	6e-09
nicotinamide metabolic process	24	0.9	6e-09
alkaloid metabolic process	24	0.9	1.1e-08
pyridine nucleotide metabolic process	24	0.9	2.1e-08
striated muscle cell development	24	0.9	3e-06
regulation of actin filament polymerization	24	0.9	6.6e-06
negative regulation of cytoskeleton organization	24	0.9	9.6e-06
coenzyme biosynthetic process	24	0.9	0.00057
heterocycle catabolic process	24	0.9	0.003
regulation of catabolic process	24	0.9	0.043
acetyl-CoA metabolic process	23	0.9	3.3e-11
nuclear export	23	0.9	0.00016
lipid modification	23	0.9	0.0014
amine catabolic process	23	0.9	0.0076
chromatin assembly	23	0.9	0.027
cell-matrix adhesion	23	0.9	0.035
protein-DNA complex assembly	23	0.9	0.043
translational initiation	22	0.8	2.8e-06
cytoskeleton-dependent intracellular transport	22	0.8	4.3e-05
cellular amino acid catabolic process	22	0.8	0.0028
nucleosome assembly	22	0.8	0.034
striated muscle contraction	21	0.8	1.8e-05
regulation of microtubule-based process	21	0.8	5.5e-05
vesicle organization	21	0.8	0.00015
nucleus organization	21	0.8	0.00015
peptide metabolic process	21	0.8	0.0002
response to hydrogen peroxide	21	0.8	0.00047
heterocycle biosynthetic process	21	0.8	0.001
nucleoside metabolic process	21	0.8	0.003
regulation of metal ion transport	21	0.8	0.043
tricarboxylic acid cycle	20	0.7	7.4e-12
acetyl-CoA catabolic process	20	0.7	7.4e-12
coenzyme catabolic process	20	0.7	3.3e-10
dicarboxylic acid metabolic process	20	0.7	2.4e-07
regulation of microtubule cytoskeleton organization	20	0.7	1.5e-05
pigment metabolic process	20	0.7	4.8e-05
cellular component disassembly	20	0.7	0.00061
cardiac muscle tissue development	20	0.7	0.0017
nucleobase, nucleoside, nucleotide and nucleic acid catabolic process	20	0.7	0.0021
endosome transport	20	0.7	0.0021
nucleobase, nucleoside and nucleotide catabolic process	20	0.7	0.0021
proton transport	20	0.7	0.004
viral reproductive process	20	0.7	0.0048
hydrogen transport	20	0.7	0.0059
maintenance of location	20	0.7	0.007
skeletal muscle tissue development	20	0.7	0.01
skeletal muscle organ development	20	0.7	0.01
nucleoside monophosphate metabolic process	20	0.7	0.01
viral reproduction	20	0.7	0.022
regulation of muscle contraction	20	0.7	0.025
vitamin metabolic process	20	0.7	0.038
regulation of gene expression, epigenetic	20	0.7	0.048
negative regulation of protein complex disassembly	19	0.7	4e-05
ER to Golgi vesicle-mediated transport	19	0.7	6e-05
protein polymerization	19	0.7	0.0006
membrane fusion	19	0.7	0.0017
oxygen and reactive oxygen species metabolic process	19	0.7	0.024
regulation of calcium ion transport	19	0.7	0.032
cellular carbohydrate biosynthetic process	19	0.7	0.032
regulation of intracellular transport	19	0.7	0.042
lipid oxidation	18	0.7	7.3e-05
fatty acid oxidation	18	0.7	7.3e-05
pyruvate metabolic process	18	0.7	0.00022
cellular response to oxidative stress	18	0.7	0.00031
nucleotide catabolic process	18	0.7	0.0029
induction of apoptosis by intracellular signals	18	0.7	0.0055
response to calcium ion	18	0.7	0.0068
RNA catabolic process	18	0.7	0.036
actomyosin structure organization	17	0.6	1.4e-06
mitochondrial membrane organization	17	0.6	1.4e-05
protein targeting to mitochondrion	17	0.6	3.8e-05
protein localization in mitochondrion	17	0.6	3.8e-05
ATP synthesis coupled proton transport	17	0.6	0.0004
energy coupled proton transport, down electrochemical gradient	17	0.6	0.0004
regulation of translational initiation	17	0.6	0.00055
maintenance of location in cell	17	0.6	0.0038
ion transmembrane transport	17	0.6	0.0047
establishment or maintenance of cell polarity	17	0.6	0.0047
regulation of protein catabolic process	17	0.6	0.0089
glutamine family amino acid metabolic process	17	0.6	0.0089
response to heat	17	0.6	0.019
gene silencing	17	0.6	0.019
cell junction organization	17	0.6	0.022
regulation of endocytosis	17	0.6	0.04
fatty acid beta-oxidation	16	0.6	9.1e-06
muscle fiber development	16	0.6	0.00024
fatty acid catabolic process	16	0.6	0.00035
microtubule-based transport	15	0.6	8.2e-05
protein targeting to membrane	15	0.6	0.00044
negative regulation of protein complex assembly	15	0.6	0.00064
cellular component assembly involved in morphogenesis	15	0.6	0.0013
pigment biosynthetic process	15	0.6	0.003
protein tetramerization	15	0.6	0.003
water-soluble vitamin metabolic process	15	0.6	0.004
cell junction assembly	15	0.6	0.0051
RNA export from nucleus	15	0.6	0.0051
positive regulation of cytoskeleton organization	15	0.6	0.013
nucleoside monophosphate biosynthetic process	15	0.6	0.031
protein heterooligomerization	15	0.6	0.043
ribonucleoside monophosphate metabolic process	14	0.5	5.5e-05
tetrapyrrole metabolic process	14	0.5	0.00037
porphyrin metabolic process	14	0.5	0.00037
cellular response to reactive oxygen species	14	0.5	0.00055
membrane docking	14	0.5	0.00081
regulation of microtubule polymerization or depolymerization	14	0.5	0.00081
spliceosome assembly	14	0.5	0.0012
Rho protein signal transduction	14	0.5	0.0067
viral infectious cycle	14	0.5	0.02
alcohol biosynthetic process	14	0.5	0.024
protein import into nucleus, docking	13	0.5	1.3e-06
retrograde vesicle-mediated transport, Golgi to ER	13	0.5	3.1e-05
heart contraction	13	0.5	0.0001
heart process	13	0.5	0.0001
ribonucleotide catabolic process	13	0.5	0.00028
regulation of actin filament depolymerization	13	0.5	0.00068
negative regulation of protein polymerization	13	0.5	0.0015
purine nucleotide catabolic process	13	0.5	0.0052
negative regulation of translation	13	0.5	0.0069
positive regulation of protein complex assembly	13	0.5	0.0089
regulation of protein stability	13	0.5	0.038
mRNA catabolic process	13	0.5	0.046
vesicle coating	12	0.4	2e-06
membrane budding	12	0.4	5.4e-06
NADP metabolic process	12	0.4	5.4e-06
purine nucleoside monophosphate metabolic process	12	0.4	0.00011
purine ribonucleoside monophosphate metabolic process	12	0.4	0.00011
myofibril assembly	12	0.4	0.00019
heme metabolic process	12	0.4	0.00033
ribonucleoside monophosphate biosynthetic process	12	0.4	0.00053
purine ribonucleotide catabolic process	12	0.4	0.00053
nucleoside triphosphate catabolic process	12	0.4	0.00083
NAD metabolic process	12	0.4	0.0013
hydrogen peroxide metabolic process	12	0.4	0.0013
vesicle docking	12	0.4	0.0019
protein homotetramerization	12	0.4	0.0019
negative regulation of actin filament polymerization	12	0.4	0.0037
cellular aldehyde metabolic process	12	0.4	0.0037
skeletal muscle fiber development	12	0.4	0.0037
mRNA export from nucleus	12	0.4	0.015
sterol biosynthetic process	12	0.4	0.024
iron ion homeostasis	12	0.4	0.029
cholesterol transport	12	0.4	0.035
sterol transport	12	0.4	0.035
vesicle localization	12	0.4	0.035
monosaccharide biosynthetic process	12	0.4	0.035
ATP catabolic process	11	0.4	5.1e-05
branched chain family amino acid metabolic process	11	0.4	5.1e-05
purine ribonucleoside triphosphate catabolic process	11	0.4	0.00036
cardiac muscle contraction	11	0.4	0.00036
intra-Golgi vesicle-mediated transport	11	0.4	0.00036
ribonucleoside triphosphate catabolic process	11	0.4	0.00036
purine nucleoside triphosphate catabolic process	11	0.4	0.001
actin filament capping	11	0.4	0.0016
regulation of mRNA stability	11	0.4	0.0016
regulation of RNA stability	11	0.4	0.0034
negative regulation of actin filament depolymerization	11	0.4	0.0034
cholesterol biosynthetic process	11	0.4	0.0067
glutathione metabolic process	11	0.4	0.012
vitamin biosynthetic process	11	0.4	0.012
regulation of fatty acid oxidation	11	0.4	0.012
spliceosomal snRNP biogenesis	11	0.4	0.012
apoptotic mitochondrial changes	11	0.4	0.025
cell aging	11	0.4	0.039
establishment of vesicle localization	11	0.4	0.039
RNA stabilization	10	0.4	0.00019
mRNA stabilization	10	0.4	0.00019
purine nucleoside monophosphate biosynthetic process	10	0.4	0.0012
purine ribonucleoside monophosphate biosynthetic process	10	0.4	0.0012
Golgi organization	10	0.4	0.0043
organelle fusion	10	0.4	0.0043
vesicle targeting	10	0.4	0.0063
intermediate filament-based process	10	0.4	0.0063
water-soluble vitamin biosynthetic process	10	0.4	0.0088
nucleobase metabolic process	10	0.4	0.0088
vesicle docking during exocytosis	10	0.4	0.012
positive regulation of protein polymerization	10	0.4	0.016
lysosome organization	10	0.4	0.016
apoptotic nuclear changes	10	0.4	0.021
muscle tissue morphogenesis	10	0.4	0.027
cardiac muscle tissue morphogenesis	10	0.4	0.027
protein stabilization	10	0.4	0.034
purine ribonucleoside metabolic process	10	0.4	0.042
regulation of protein binding	10	0.4	0.042
purine nucleoside metabolic process	10	0.4	0.042
ribosomal small subunit biogenesis	9	0.3	6.2e-05
branched chain family amino acid catabolic process	9	0.3	6.2e-05
vesicle targeting, to, from or within Golgi	9	0.3	0.00016
hydrogen peroxide catabolic process	9	0.3	0.0035
negative regulation of microtubule polymerization or depolymerization	9	0.3	0.0035
axon cargo transport	9	0.3	0.0054
DNA duplex unwinding	9	0.3	0.0054
protein export from nucleus	9	0.3	0.0054
cellular response to hydrogen peroxide	9	0.3	0.0054
DNA geometric change	9	0.3	0.0054
negative regulation of endothelial cell proliferation	9	0.3	0.0054
glutamine metabolic process	9	0.3	0.008
tetrapyrrole biosynthetic process	9	0.3	0.011
porphyrin biosynthetic process	9	0.3	0.011
intermediate filament cytoskeleton organization	9	0.3	0.011
response to axon injury	9	0.3	0.011
cell-substrate junction assembly	9	0.3	0.028
protein targeting to ER	8	0.3	9.6e-05
pentose-phosphate shunt	8	0.3	9.6e-05
ribosomal large subunit biogenesis	8	0.3	0.00027
2-oxoglutarate metabolic process	8	0.3	0.00027
Golgi transport vesicle coating	8	0.3	0.00027
COPI coating of Golgi vesicle	8	0.3	0.00027
Golgi vesicle budding	8	0.3	0.00027
mitochondrial respiratory chain complex assembly	8	0.3	0.0013
DNA unwinding during replication	8	0.3	0.0042
nucleobase biosynthetic process	8	0.3	0.0042
mitotic spindle organization	8	0.3	0.0067
lipoprotein particle clearance	8	0.3	0.01
'de novo' protein folding	8	0.3	0.01
regulation of ATPase activity	8	0.3	0.01
regulation of microtubule depolymerization	8	0.3	0.01
regulation of the force of heart contraction	8	0.3	0.01
negative regulation of microtubule depolymerization	8	0.3	0.01
neuromuscular junction development	8	0.3	0.038
regulation of RNA splicing	8	0.3	0.038
glutamine family amino acid catabolic process	8	0.3	0.038
release of cytochrome c from mitochondria	8	0.3	0.049
mitochondrial respiratory chain complex I assembly	7	0.3	0.0025
NADH dehydrogenase complex assembly	7	0.3	0.0025
mitochondrion morphogenesis	7	0.3	0.0047
cotranslational protein targeting to membrane	7	0.3	0.0081
cortical cytoskeleton organization	7	0.3	0.019
DNA replication initiation	7	0.3	0.038
lamellipodium assembly	7	0.3	0.038
NADH metabolic process	6	0.2	0.0047
malate metabolic process	6	0.2	0.0047
purine base biosynthetic process	6	0.2	0.0091
inner mitochondrial membrane organization	6	0.2	0.0091
peptidyl-asparagine modification	6	0.2	0.016
ribonucleoside diphosphate metabolic process	6	0.2	0.016
protein amino acid N-linked glycosylation via asparagine	6	0.2	0.016
ribosome assembly	6	0.2	0.016
oxaloacetate metabolic process	6	0.2	0.016
pentose metabolic process	6	0.2	0.025
mRNA cleavage	6	0.2	0.025
mRNA polyadenylation	6	0.2	0.025
regulation of mitochondrial membrane potential	6	0.2	0.025
positive regulation of actin filament polymerization	6	0.2	0.037
protein-lipid complex assembly	6	0.2	0.037
plasma lipoprotein particle assembly	6	0.2	0.037
sarcomere organization	6	0.2	0.037
retrograde axon cargo transport	5	0.2	0.0034
mitochondrial fusion	5	0.2	0.0034
isocitrate metabolic process	5	0.2	0.0034
SRP-dependent cotranslational protein targeting to membrane	5	0.2	0.0088
skeletal myofibril assembly	5	0.2	0.0088
acetyl-CoA biosynthetic process	5	0.2	0.0088
IMP metabolic process	5	0.2	0.0088
IMP biosynthetic process	5	0.2	0.0088
'de novo' IMP biosynthetic process	5	0.2	0.0088
negative regulation of fibrinolysis	5	0.2	0.0088
glucocorticoid receptor signaling pathway	5	0.2	0.018
citrate metabolic process	5	0.2	0.018
nuclear envelope organization	5	0.2	0.018
substrate adhesion-dependent cell spreading	5	0.2	0.018
protein neddylation	5	0.2	0.018
AMP metabolic process	5	0.2	0.018
intracellular lipid transport	5	0.2	0.018
endomembrane organization	5	0.2	0.031
purine nucleoside diphosphate metabolic process	5	0.2	0.031
regulation of defense response to virus by virus	5	0.2	0.031
provirus integration	5	0.2	0.031
regulation of centrosome cycle	5	0.2	0.031
cytoskeletal anchoring at plasma membrane	5	0.2	0.031
purine ribonucleoside diphosphate metabolic process	5	0.2	0.031
corticosteroid receptor signaling pathway	5	0.2	0.031
lysogeny	5	0.2	0.031
succinate metabolic process	5	0.2	0.049
Golgi to endosome transport	5	0.2	0.049
regulation of fibrinolysis	5	0.2	0.049
mitochondrial outer membrane translocase complex assembly	4	0.1	0.016
regulation of interferon-gamma-mediated signaling pathway	4	0.1	0.016
outer mitochondrial membrane organization	4	0.1	0.016
aspartyl-tRNA aminoacylation	4	0.1	0.016
peptidyl-histidine phosphorylation	4	0.1	0.036
high-density lipoprotein particle assembly	4	0.1	0.036
clathrin coat assembly	4	0.1	0.036
muscle thin filament assembly	4	0.1	0.036
ribonucleoside diphosphate biosynthetic process	4	0.1	0.036
porphyrin catabolic process	4	0.1	0.036
cardiac muscle fiber development	4	0.1	0.036
purine ribonucleoside diphosphate biosynthetic process	4	0.1	0.036
ADP biosynthetic process	4	0.1	0.036
protein maturation by protein folding	4	0.1	0.036
purine nucleoside diphosphate biosynthetic process	4	0.1	0.036
nuclear mRNA 3'-splice site recognition	4	0.1	0.036
tetrapyrrole catabolic process	4	0.1	0.036
